# Supplementary material for: Continuous carbon nanotube composite fibers: properties, potential applications, and problemsElectronic supplementary information (ESI) available: frontispiece figure. See http://www.rsc.org/suppdata/jm/b3/b312092a/
Source: Royal Society of Chemistry journal article supplement (doi:10.1039/b312092a), 2003-12-23
Supplement: b312092a.pdf [file b312092a.pdf]

# ***Journal of Materials Chemistry* Highlight**

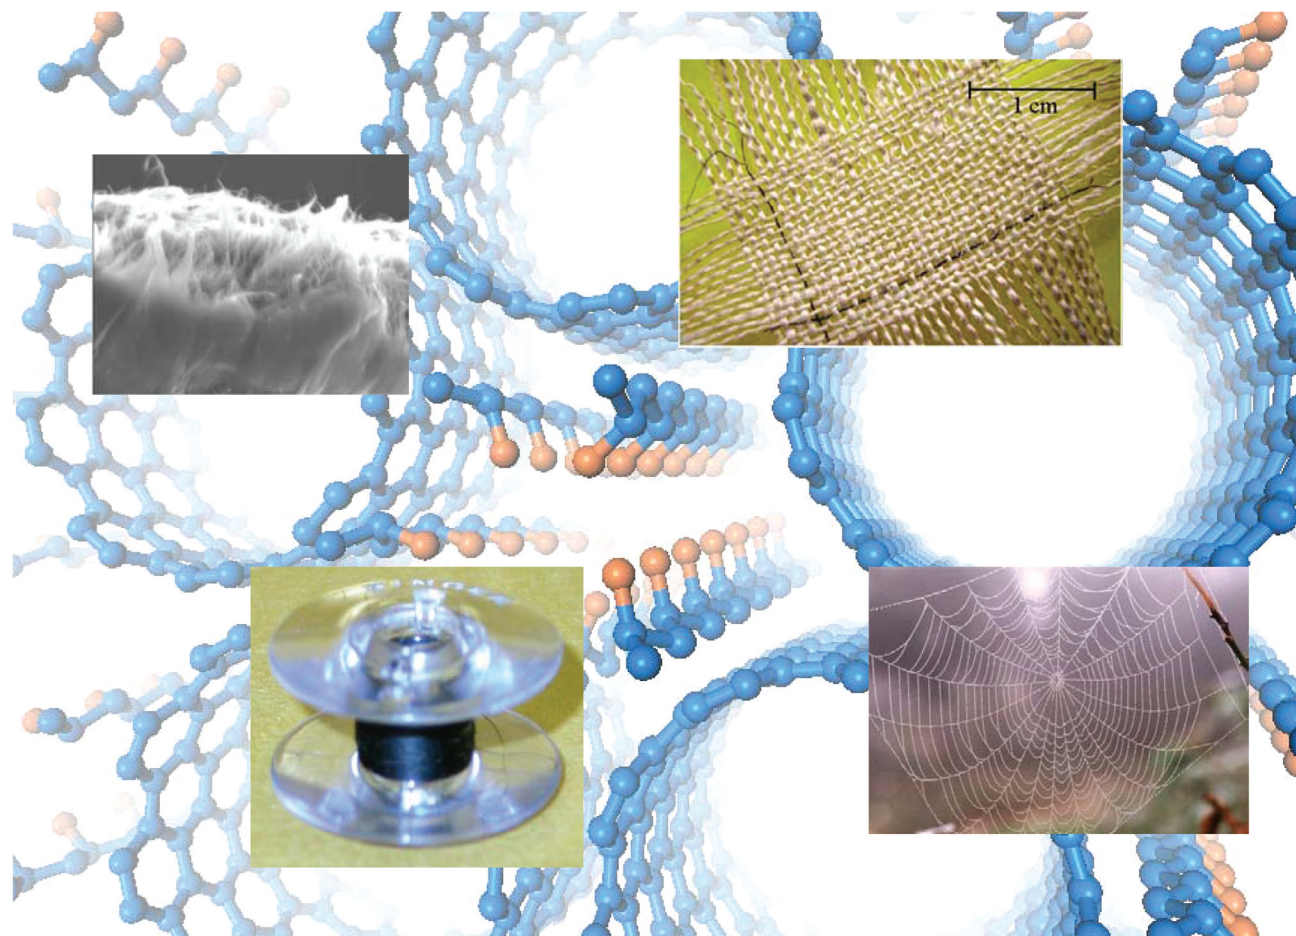

**Continuous carbon nanotube composite fibers:  
properties, potential applications, and problems**  
*Alan Dalton et al.*
